# Supplementary material for: The Impact of Longitudinal Surveillance on Tumor Thickness for Melanoma-Prone Families with and without Pathogenic Germline Variants of CDKN2A and CDK4
Source: Oxford University Press journal article supplement (doi:10.1158/1055-9965.epi-20-1521), 2021-04-01
Supplement: 10559965epi201521-sup-254294_2_supp_6834820_qnlw79.docx [file 10559965epi201521-sup-254294_2_supp_6834820_qnlw79.docx]

**Supplemental Table 4. Clinical characteristics of individuals with invasive melanoma without clinical or histologic evidence of dysplastic nevi and/or without the family’s identified mutation**

| **Patient** | **Sex** | **Age at cutaneous melanoma diagnosis** | **Melanoma diagnosis number** | **Subtypea** | **Thickness, mm** | **Site** | **Dysplastic nevi** | **Mutation** |
| --- | --- | --- | --- | --- | --- | --- | --- | --- |
| A | Male | 47 | 1 | SSM | 0.9 | Scalp | No | Yes |
| B | Male | 95 | 1 | LMM | Not measured | Back | No | None foundb |
| C | Male | 52 | 1 | NM | 1.4 | Calf | No | Yes |
| D | Male | 39 | 1 | SSM | 0.3 | Face | No | Yes |
|  |  | 43 | 2 | SSM | Not measured | Calf | No | Yes |
| E | Male | 41 | 1 | SSM | Not measured | Ear | No | Yes |
| F | Male | 18 | 1 | SSM | Not measured | Chest | No | None foundb |
| G | Female | 31 | 1 | SSM | Unknown | Arm | No | None foundb |
| H | Male | 66 | 1 | Unknown | 0.6 | Back | No | No |
| I | Female | 47 | 1 | SSM | 0.4 | Abdomen | Yes | No |
| J | Male | 67 | 1 | LMM | 0.4 | Face | Yes | No |
| K | Male | 42 | 1 | SSM | 0.5 | Ear | Yes | No |
| L | Female | 54 | 1 | SSM | Not measured | Chest | indeterminate | No |
| M | Male | 25 | 1 | SSM | 0.9 | Chest | Yes | No |
| N | Male | 62 | 1 | LMM | 0.5 | Arm | Yes | No |
| O | Male | 45 | 1 | SSM | Not measured | Arm | Yes | No |
| P | Female | 41 | 1 | SSM | 0.5 | Abdomen | Yes | No |
| Q | Male | 25 | 1 | Unknown | Unknown | Shoulder | Yes | No |
| R | Female | 48 | 1 | SSM | Not measured | Hip | Yes | No |

a Superficial spreading melanoma, SSM; lentigo maligna melanoma, LMM; nodular melanoma, NM

b No causal mutation found in family
